# Supplementary material for: Genome-Wide Characterization of the Brassica juncea NDPK Gene Family and Functional Analysis in Root Development Under Drought Stress
Source: Research Square preprint supplement (doi:10.21203/rs.3.rs-8694630/v1), 2026-02-04
Supplement: Supplementary file 1 [file 0f83876d5f3cd45712647c4f.xlsx]

## Sheet: Sheet1
3D modeling information of NDPK protein
sequence ID	Gene ID	QMQE	QMEAN	OliGE-STATE	Seq-Identify	PDBID	SIM
transcript:AT4G09320.1	AtNDPK1	0.93	0.85	Homo-hexamer	1	1w8w.1.A	0.62
transcript:AT5G63310.1	AtNDPK2	0.58	0.87	Homo-hexamer	0.897	1u7w.1.A	0.61
transcript:AT4G11010.1	AtNDPK3	0.58	0.86	Homo-hexamer	0.9085	1w7w.1.A	0.59
transcript:AT4G23900.1	AtNDPK4	0.62	0.88	Homo-hexamer	1	1s59.1.A	0.62
transcript:AT1G17410.1	AtNDPK5	0.58	0.86	Monomer	0.85	R0GMY8.1.A	0.56
BjuVA01G15720.1	BjNDPK1	0.58	0.86	Homo-hexamer	0.85	1w7w	0.59
BjuVA02G31310.1	BjNDPK2	0.47	0.75	Homo-hexamer	0.9286	1w7w.1.A	0.54
BjuVA03G44880.1	BjNDPK3	0.8	0.74	Homo-hexamer	0.94	3vvu.1.B	0.5
BjuVA06G28970.1	BjNDPK4	0.61	0.84	Homo-hexamer	0.9608	1s59.1.A	0.66
BjuVA08G00430.1	BjNDPK5	0.92	0.86	Homo-hexamer	0.8851	1u8w.1.A	0.59
BjuVA08G31340.1	BjNDPK6	0.86	0.76	Monomer	0.9257	A0A3P6BZW4.1.A	0.58
BjuVA09G08030.1	BjNDPK7	0.63	0.86	Homo-hexamer	0.9346	1s59.1.A	0.6
BjuVA09G21280.1	BjNDPK8	0.93	0.87	Homo-hexamer	0.8619	1u8w.1.A	0.59
BjuVA09G27700.1	BjNDPK9	0.6	0.81	Homo-hexamer	0.902	1w7w.1.A	0.57
BjuVB03G06790.1	BjNDPK10	0.87	0.85	Monomer	0.8807	A0A3P6BZW4.1.A	0.57
BjuVB04G15590.1	BjNDPK11	0.93	0.87	Homo-hexamer	0.9054	1u8w.1.A	0.59
BjuVB05G13160.1	BjNDPK12	0.59	0.81	Homo-hexamer	0.8627	1w7w.1.A	0.58
BjuVB05G47190.1	BjNDPK13	0.58	0.86	Homo-hexamer	91.5	1w7w.1.A	0.6
BjuVB05G51000.1	BjNDPK14	0.63	0.76	Homo-hexamer	83.54	A0A0D3CY49.1.A	0.56
BjuVB06G12430.1	BjNDPK15	0.62	0.86	Homo-hexamer	95.42	1s59.1.A	0.6
BjuVB07G18080.1	BjNDPK16	0.61	0.87	Homo-hexamer	94.77	1s59.1.A	0.6
BjuVB07G49680.1	BjNDPK17	0.92	0.86	Homo-hexamer	87.15	1u8w.1.A	0.59
BjuVB08G41150.1	BjNDPK18	0.59	0.89	Homo-hexamer	90.2	1w7w.1.A	0.59
