# Supplementary material for: Genome-Wide Characterization of the Brassica juncea NDPK Gene Family and Functional Analysis in Root Development Under Drought Stress
Source: Research Square preprint supplement (doi:10.21203/rs.3.rs-8694630/v1), 2026-02-04
Supplement: Supplementary file 2 [file 6a8800f506e49553fc8ba592.xlsx]

## Sheet: qpcr引物
Sequence ID	Primer ID	Primer Sequence
BjuVA01G15720.1	BjANDPK1b_F	ATGACCGGTCTCCTCGCT
BjuVA01G15720.1	BjANDPK1b_R	CAGTCCTCGCTGCACTCC
BjuVA02G31310.1	BjANDPK2b_F	TGGCTCTTCCTGCTGCAG
BjuVA02G31310.1	BjANDPK2b_R	CGCTGGACTCCATCAGGC
BjuVA03G44880.1	BjANDPK3b_F	CGCTGTGGACCGTCCTTT
BjuVA03G44880.1	BjANDPK3b_R	ATTGCAACCACTGGGCCA
BjuVA06G28970.1	BjANDPK4b_F	TTCGAGCTCCGCCGATTC
BjuVA06G28970.1	BjANDPK4b-R	GGCCTCTTTGGATGCCGT
BjuVA08G00430.1	BjANDPK5b_F	TCGGAGCAACGAACCCTG
BjuVA08G00430.1	BjANDPK5b_R	TCCACCGAGTCACTCCCA
BjuVA08G31340.1	BjANDPK6b_F	CGGGCCTACTGATTCGCA
BjuVA08G31340.1	BjANDPK6b_R	TTGAATCGGAGCCGTGCA
BjuVA09G08030.1	BjANDPK8b_F	TCGTACTCCTCCGTCCCG
BjuVA09G08030.1	BjANDPK8b_R	GAAGCGACGAGGTGAGGG
BjuVA09G21280.1	BjANDPK9b_F	GCAACTAACCCTGCGGCT
BjuVA09G21280.1	BjANDPK9b_R	TCCACTGAGTCGCTCCCA
BjuVA09G27700.1	BjANDPK10b_F	AGCGGTCACTGCATCTGC
BjuVA09G27700.1	BjANDPK10b_R	CTGCAGCAGGAAGAGCCA
BjuVB03G06790.1	BjBNDPK1b_F	TGACAAGTGGTCCGGTGC
BjuVB03G06790.1	BjBNDPK1b_R	TTGCGCATCAGTAGGCCC
BjuVB04G15590.1	BjBNDPK4b_F	CTGCTGCCTCTGAGCCAG
BjuVB04G15590.1	BjBNDPK4b_R	ACCACAACGCAGCTTCCT
BjuVB05G13160.1	BjBNDPK5b_F	ATCACCGGTCTCCTCGCT
BjuVB05G13160.1	BjBNDPK5b_R	TATCAGGCCTCGCTGCAC
BjuVB05G47190.1	BjBNDPK6b_F	AGGACGAGCCATTGGTGC
BjuVB05G47190.1	BjBNDPK6b_R	GCAGCACCAGAACCGGAT
BjuVB05G51000.1	BjBNDPK7b_F	TCCTCGTGACTCGGAGGC
BjuVB05G51000.1	BjBNDPK7b_R	CAACGGGGCCCTTTGAGA
BjuVB06G12430.1	BjBNDPK8b_F	CTCGCCGTCGCCTAAAGT
BjuVB06G12430.1	BjBNDPK8b_R	CTGCCAGCTCGGTGCATA
BjuVB07G18080.1	BjBNDPK9b_F	GCTTCGCCGTCGTCTTCT
BjuVB07G18080.1	BjBNDPK9b_R	GAGGACGGAATGCTGCCA
BjuVB07G49680.1	BjBNDPK10b_F	TGGCTCTTCCTGCTGCAG
BjuVB07G49680.1	BjBNDPK10b_R	AGTCCTCGGTGCACTCCA
BjuVB08G41150.1	BjBNDPK11b_F	TGGCTCTTCCTGCTGCAG
BjuVB08G41150.1	BjBNDPK11b_R	CAGTCCTCGGTGCACTCC
BjuVB08G44820.1	BjBNDPK12b_F	GACGACGCCAGCAAGGAT
BjuVB08G44820.1	BjBNDPK12b_R	ATGGCGTTTCCCAGGCAA
	qBjActin-F	GGCTACTCTTTCACCACGAC
	qBjActin-R	GGATACCAGCATTCTCCATAC
	BjuTIP41-F	TAGCGGAGTTGTTGAGAA
	BjuTIP41-R	TGTCAGCCAGTTCATCTT
	Bj18srRNA-F	TCTGACGCAAGCACAACTA
	Bj18srRNA-R	TCTTCTCAGCTTTAGCCATT
