# Supplementary material for: Genome-Wide Characterization of the Brassica juncea NDPK Gene Family and Functional Analysis in Root Development Under Drought Stress
Source: Research Square preprint supplement (doi:10.21203/rs.3.rs-8694630/v1), 2026-02-04
Supplement: Supplementary file 3 [file cbb88dbaf8f9e6678a042762.xlsx]

## Sheet: Sheet1
Sequence information of the gene family
seq-ID	gene-ID	DNA-Seq	RNA-seq	Protein-Seq
BjuVA01G15720.1	BjNDPK1	AATATTGCTAGACAAGGCACAAGGGTGAAACCTTTGAGTTTCAGCTGATATCATTATTATTTTGTGGGTGCTTTTGCATAGAGTAGGCCTCCCTCATAGTGAAAGCCATTCCTGGACTCGCAGAAAACCGAAAAGAGCAGTAATAATGATGAATTTGTTCACTCTTCTTACTTACAAGAATGAGAAGCTTACCTCAAAGCACAGTAAGTCATTTGCTACAAAACTGTTCCCCATACTCATATCAACAACTCTAGATCTCATTTTTGTCTACTCCTTATGTTGGAACATGTGGATGAAATCTTGCGCTCTGCTCGTTTATCTAGCTATTTTGTCTACTCCACATCACTTTCCATTGATCCGTGATGCTCACGGTAGTGTAGTTGTATTTACATATTTTCC…	ATGAGCTCCCAAATATGCAGATCAGCTACTAGGGCAGCAAGGTCTCTCCTTTCTTCATCTAAGAACACTCGTTTCTTCTCCGAAGGGAGAGCCATTGGTGCATCAACAGTGGTGTATGCGTCTGGAAAAGTCCCTCAGAATGCATCAAAATTTCGGCAATCGAGTTCTGGCTTCGCCTCTAAGAGCTGGATGACCGGTCTCCTCGCTCTTCCTACCGCAGCCTTCATGCTCCAAGATCAGGAAGTCCATGCTGCTGAGATGGAACGCACTTTCATCGCTATCAAACCTGATGGAGTGCAGCGAGGACTGATATCAGAAATCATTACCCGGTTCGAACGCAAAGGATTCAAGCTTGTTGGTCTCAAAATCATGGTTCCTTCAAAGGGCTTCGCGCAGCAA…	MSSQICRSATRAARSLLSSSKNTRFFSEGRAIGASTVVYASGKVPQNASKFRQSSSGFASKSWMTGLLALPTAAFMLQDQEVHAAEMERTFIAIKPDGVQRGLISEIITRFERKGFKLVGLKIMVPSKGFAQQHYHGAKERPFFNGLCNFLSSGPVVAMVWEGEGVIRYGRKLIGATDPQKSEPGTIRGDLAVVVGRNIIHGSDGPETAKDEISLWFKPEELVSYTSNAEKWIYGQN*
BjuVA02G31310.1	BjNDPK2	ACCCGAAACACGAACCTGAATGCCCACTCCTAATCACTATTATATATATATCCTATATGTGTCATCATAGGTTACAAAATATGTGTTATCATATAATTACTCATATTTTATACGTACCATCAAATAAGTTTTCTTATAATTAATAATATTTTATACGTACAATCATATAAATAATCACATAAATTATATTTTAAAATTTAATGTGAAATATAAAAACCATAATTTAAGTTGGTGTTTGTAATTGGGCTTTGTATTATATTTTTCTTATATATATTGAAAACATTTTTATAATAGTTATTGGAAAATATGTTAGTAAAAATCAAATTTTGAATATATGTTTATTTTTGAAAGAATTTTTGATATAAATCAATTTTAAATTATTATTTTGATTTGAATATA…	ATGAGCTCCCAAATCTGCAGATCTGCTTCGAAAGCAGCAAGGTCTCTTCTCTCTTCAGCTAAGAATGCTCGTCTCTTCTCCGAAGGACGAGCCATTGGTGCGGCGGCTGCGGTTACTGCATCTGGAAAGATGCCTCTCTATGCATCTAACTTTGCCAGATCATCAGGTTCTTCAAAGAGTTGGATCACTGGACTCTTGGCTCTTCCTGCTGCAGCCTTCATGGTTCAAGATCAGGAGGTTTTTGCTGCTGAGATGGAACGCACTTTCATTGCGATCAAGCCTGATGGAGTCCAGCGAGGATTGATATCAGAGATCATTTCTCGATTTGAACGCAAGGGATTCAAGCTTGTTGGTATCAAGGTCGTTGTTCCTTCCAAAGATTTCGCGCAGAAGCATTAC…	MSSQICRSASKAARSLLSSAKNARLFSEGRAIGAAAAVTASGKMPLYASNFARSSGSSKSWITGLLALPAAAFMVQDQEVFAAEMERTFIAIKPDGVQRGLISEIISRFERKGFKLVGIKVVVPSKDFAQKHYHDLKERPFFNGLCDFLSSGPVIAMVWEGEGVIRYGRKLIGATDPQKSEPGTIRGDLAVVVGRNIIHGSDGPETAKDEINLWFKPQELVSYTNNAEKWIYGDN*
BjuVA03G44880.1	BjNDPK3	CAACAATCTCAAATTGTGGAAGAAGAAATCGATTGAGATGTCTTTCTTTTGGGTTATTCAATAGCACAAAATATGACGTGGCGTGTAATGGTGTAAAAGCAAAGCAAAGGAAGTGGAGGAGAGCCAGAGACATTGGAGAAGACAAGAGTATGAGCTCTTATTTCTCAACCTGACCATTGAGTGTTGACGATGACTGCGAATTGTTGAAGACGAAAGAGAAAAAAAAAACATAACAATTTTGCTTAAAGAAAGATGTAGTCGTTTGGTATTAAAGCAGCGAACTTGTTGAAATGCGCCAAATTTAATCTCTTTACAAGGAAAACTGTACAGGAAAAAAGAGTGTTAAACGAGACTCTCTTTGTAATTTGTTGTAGAACTCTTTGATTGATTGGTTAGACC…	ATGATCAAGCCCGACGGCGTCCAGAGGAGTCTGGTCGGTGAAATCATCGGCAGGTTTGAGAATAAGGGTTTCACTTTGAAAGGTCTAAAGCTGATCGCTGTGGACCGTCCTTTTGCTGAGAAACACTACCAAGACTTGTCTGCCAAGCCTTATAGCCTTGTTGATTACATAATTTCTGGCCCAGTGGTTGCAATGATCTGGGAGGGGAAGAATGTTACTAACCCTGCAGCTTCTGAACCAGGAACCATCCGTGGTGATTTTAACGTGATCCATGGGAGCGACTCAGTGGAGAGTGCTAACAAGGAATCTGCATTTGGTTCCCAGATGGACCTGTGA	MIKPDGVQRSLVGEIIGRFENKGFTLKGLKLIAVDRPFAEKHYQDLSAKPYSLVDYIISGPVVAMIWEGKNVTNPAASEPGTIRGDFNVIHGSDSVESANKESAFGSQMDL*
BjuVA06G28970.1	BjNDPK4	ATACATTGATCAGAAGAAACCCTGCAAACAATTTTCCTTCTACTACCACGACATCATCTACGATGGCGCCGACAATGCTGCAAATGCCACCTCAGCTGCGATCGTCAACCCTCCAGGATTAGGAAACTTCAAATTTGGAAAGTTAGTGATCTTCGACGACCCCATAACAATGGACACGAACTACCTCTCAGAATATGTGGCTCGCGCACAAGGCTTCTATTTCTACGACAAGAAGTTGGGCGTCAATGCTTGGATCTGCTTGACGTTAGTGTTTAACTCGACGGAACACAAAGGGACGTTGAACATAATGGGTGCAGACTTGATGAGGGAGCCGACAAGAGATATACCAGTCGTTGGTGGGACTGGTGACTTCTTTATGGCACGTGGGATCGCTACCGT…	ATGGTTGGTATGGCTGTGGTTGGTCAATGGACTCTCTGTGTCGCTTCGCCGTCGCCGAGAGTAAAGTCGGCAACTTGCAATTCAAACTCTTGTCCAACCACCGTTAACTTACGCACTAAGCTGGCTGCATTTCGTCCTCAGTTCCGGCTCTTCTCTCGTGTTTCTCCGACACGCCGCCGTCTTTGCGCTTCGAGCTCCGCCGATTCGGGAATCTTCCTCCCTCACCTCGTCGCTTCTATGGAGCAAGTTGAGGAGACTTACATTATGGTCAAACCAGACGGCATCCAAAGAGGCCTTGTTGGAGAAATCATCTCTCGTTTTGAGAGGAAGGGATTTAAACTGATTGGACTTAAGATGTTCCAATGCCCAAAAGAATTGGCTGAGGAACACTATAAGGAT…	MVGMAVVGQWTLCVASPSPRVKSATCNSNSCPTTVNLRTKLAAFRPQFRLFSRVSPTRRRLCASSSADSGIFLPHLVASMEQVEETYIMVKPDGIQRGLVGEIISRFERKGFKLIGLKMFQCPKELAEEHYKDLSAKSFFPSLIEYITSGPVVCMAWEGVGVVASARKLIGKTDPLQAEPGTIRGDLAVQTGRNIVHGSDSPENGKREIALWFKEGELCGWDSALAKWLRE*
BjuVA08G00430.1	BjNDPK5	CCGTGGCGGGGAAGCTTCCTCAGTTCCGCCGTCGTCGGCTCTAGTCTCCGGGGGGTGAAGGCTATCACAGCTTCGCGTCGCCGGATCTCGTCCCCTAGTCTTTTAGGGTTTGGTCTTTTTAGTTTAAGTTTTTCTCATCGCTTTGTCTTAGGGTTTGGTTTTGTACTCGCGTCGTAGGAGAGAGGAGATCTCCGGTGAAACGGTTAGGTTGCATGCGATATTTTCTTTGGGTGGTTGTCGTGATTGGTGGTGGAGGTGATCTCGCCATGGCGATCGATCCCTTCCGGTTTTAGAGGCCCAAAGACGCTTGCGGAGAGGTATGGTGGAGCTGCGGTGCTCCGGTTTGGTCGAGAGATCCGAAGGTTGGATCTCCGGCGAAGTTGTTAGGTGGTGGAGATG…	ATGGAGCAAACTTTCATCATGATCAAGCCCGACGGCGTCCAAAGGGGTCTGGTCGGTAAAATCATCTGCAGGTTCGAGCAGAAGGGTTTCACTTTGAAAGGTCTAAAGCTGATCACTGTGGACCGTCCTTTTGCTGAGAAACACTACCAGGACTTGTCAGCCAAGCCCTTCTTCAGTGGTCTTGTTGATTACATAATCTCTGGTCCAGTCGTTGCAATGATCTGGGAGGGAAAGAATGTTGTGTTGACAGGAAGGAAGATCATCGGAGCAACGAACCCTGCAGCATCTGAGCCAGGAACCATCCGTGGGGATTTTGCAATTGACATTGGGAGGAACATTATCCATGGGAGTGACTCGGTGGAGAGTGCTAACAAGGAGTGTGCGTTGTGGTTCCCTGAT…	MEQTFIMIKPDGVQRGLVGKIICRFEQKGFTLKGLKLITVDRPFAEKHYQDLSAKPFFSGLVDYIISGPVVAMIWEGKNVVLTGRKIIGATNPAASEPGTIRGDFAIDIGRNIIHGSDSVESANKECALWFPDGPVNWQSSLHSWIYE*
BjuVA08G31340.1	BjNDPK6	TATTTACGTATGTATCCAAGCTCTAGTAAAATTCTAGAATAATTCAAACATAAGCTCTGCATTCTAACATCGAGCTATGGTTTAGCAAAAAAAAAGCATCGAGCTGTATAGCCGTTCATTCGAATATAATAGTATATGATATGGTATACAAGAAAACTGATATTTTTAGTTAGTACGTATTTGCACCGTCCAACCAACAAATCTCTGTGACTTGGTATCAGACAGGAATACGAATTTGATCAGGAGATGTTTTTGTCAACGAATCCAAGTAAATTATAGTTACATGTCAATATCATTTTATTGGTTTATTTTTGAAAGCCTAAATTGTGAGATTTTGGTGGATCTTATGAATTTGAATGCTACACGAATAAGACGTCTGTGCAAATTTCGGCCCATGAA…	ATGTCAGGATTCGCAGCTCACCTAGTGCTCCTCCTCGTTCTTGTCTCTGTCTCCTTGTCGCCGTCGGTCAGGTGTTTAGGTAAAGAGAGAACATTGGCTATGATAAAGCCAGATGGAGTCTCTGGTAACTACACTGAAGAAATCAAAAGGCTCATTGTCGAGGCTGGTTTTAATATCGTCAAGGAGAAGCTTACTCAGCTTGACAAGGAGACAGCCTCTACGTTCTACGACGAGCACTCGTCAAGGAGCTTTTTTCCTCATCTTGTTTCTTACATGACAAGTGGTCCTGTGGTGGTGATGGTGTTGGAGAAGAGAGACGCAGTTTCTGATTGGCGCGGTTTAATCGGGCCTACTGATTCGCAAAAGGCTAAGATTTCTCATCCTCACAGCATCAGAGCA…	MSGFAAHLVLLLVLVSVSLSPSVRCLGKERTLAMIKPDGVSGNYTEEIKRLIVEAGFNIVKEKLTQLDKETASTFYDEHSSRSFFPHLVSYMTSGPVVVMVLEKRDAVSDWRGLIGPTDSQKAKISHPHSIRALCGKDSQRNCVHGSDSTSSAEREINFFFKDVVSGDIASQHDEL*
BjuVA09G08030.1	BjNDPK7	GTGGACGAGGGAGATAAAGAAGCTGGAATTGTGGACATGGGAGAGGAAGAAACCGAAGGTGTCGACATGGTAAAGGAGGTAGAAACCGAAGGTGTCGACATGAGAGAGCAAGAGACTGAAGCTGTTGACAAAGTAGAGAAAGAAACCGAAGTTGTCGTCATGGGAAAGAAAGAAACCGAAGTTGTCGTCATGGGAAAGAAAGAAAATGAAATTGGCGGCATTAGAGAGGAAGAAACTGAAGTTGTCCACAAGAGAGAGGAGGAAACTGAAGTTGTGGAAAATGGAGAGGAAGAAACAGAAGTTGTCGACATGGGAGATGAGGAAACTGAAGTTGTCCAGACGAGAGAAGAAGAAGAAGTTGTGGGCAAGGGACAGGAAGTAAGTGAAAGTCTACACAAG…	ATGGCTGTGGTTGGTCAATGTACTCTCTGCGTCGCTTCGCCGTCGCCGAGATTAACTCCGGCGATTTGCAATTCAACCTCTTCTCCAACCACTGTTAACCTCCGCGCTGAGTTAGCAGCATTCCGTCCTCAGTTCCGTCTATTCTCTCGTACTCCTCCGTCCCGTCGCCGTCTTCGCGCTTCCAGCTCCTCCGAGTCAGGAATCTTCCTCCCTCACCTCGTCGCTTCTATGGAGCAAGTTGAGGAGACTTACATCATGGTGAAACCAGACGGCATACAACGAGGCCTTGTTGGAGAAATCATCTCTCGTTTTGAGAAGAAGGGGTTTAAACTCATTGGACTTAAGATGTTTCAGTGCCCTAGAGAGTTAGCTGAGGAACATTATAAGGATCTTAGCTCT…	MAVVGQCTLCVASPSPRLTPAICNSTSSPTTVNLRAELAAFRPQFRLFSRTPPSRRRLRASSSSESGIFLPHLVASMEQVEETYIMVKPDGIQRGLVGEIISRFEKKGFKLIGLKMFQCPRELAEEHYKDLSSKSFFPSLIEYITSGPVVCMAWEGIGVVASARKMIGKTDPLQAEPGTIRGDLAVQTGRNIVHGSDSPENGKREIALWFKEGELCEWDSVLAKWLRE*
BjuVA09G21280.1	BjNDPK8	AAACATCGTTATAAGAGCATCTCCAACCCCAAGCTATTTTCACCTCTATATGTTATAATAGAGGTAAAAGTGCTCCATCCCATCTCTATTTCCACCTCTAAAATAGAGATTGCTATTTTTTCCTCTATTTATAGATGAAAAAGTAGCATTCCTCTATTATAGAGTCATACTTTTTTATTTTCAAAATAGTCCTTTAACTTTCAAATTTTTATAGTTGTAACCAAAATAATTATATTTATAGAGAAATACAGCTTTTGTAGGAGTATAATAATATTTTTTATTTACATAATAATCTTTTAACAAAACTTTAGTTTAAAAAAATTCATAAGTTTATGAAAATATTTTAAAAGTTAAAAATAAATAGGGTTAGTTATCAACTTTTATAAACAAAATGTATCT…	ATGGAACAAACTTTCATCATGATCAAGCCCGACGGCGTCCAGAGGGGTCTGGTCGGTGAAATCATCTGCAGGTTCGAAAAGAAGGGTTTCACTTTGAAAGGTCTAAAGCTGATCACTGTGGACCGTCCTTTTGCTGAGAAACACTACCAAGACTTGTCTGCCAAGCCTTTCTTCAGCAGCCTTGTTGATTACATCATCTCTGGCCCAGTCGTTGCTATGATCTGGGAGGGGAAGAACGTTGTCTTGACAGGAAGAAAGATCATTGGAGCAACTAACCCTGCGGCTTCTGAACCAGGAACCATCCGTGGCGATTATGCAATTGACATTGGCAGGAACGTGATCCATGGGAGCGACTCAGTGGAGAGTGCTAACAAGGAAGCTGCGTTGTGGTTTCCTGAT…	MEQTFIMIKPDGVQRGLVGEIICRFEKKGFTLKGLKLITVDRPFAEKHYQDLSAKPFFSSLVDYIISGPVVAMIWEGKNVVLTGRKIIGATNPAASEPGTIRGDYAIDIGRNVIHGSDSVESANKEAALWFPDGPVNWQSSLHSWIYE*
BjuVA09G27700.1	BjNDPK9	ACCCACAATCGTGTTGGAGGCGGTAGCTGGACAGGACCTCTGGATATGGCATGCGTTTTTTGGAGCTCCAGGTACTATGAATGATCTTAATATTCTTGATCGATCACCTGTTTTTGATGAAATAATTAACGGAAACGCTCCGGAAGTCAATTTCCATGTCAACGGAAGGGAGTACGATTTGGGTTACTATCTTGCCGATGGTATTTACCCGAAATGGGCTACTTTTATTCAATCAATCCGACTCCCACAAGGTCCAAAACCTTGTTTATTTGCTAAAAGACAAGAATTCGTGCGAAAAGATGTTGAGCGTGCCTTCGGAGTCCTGCAAGCTAGATTTGCGGTTGTTAGAAATCCTTCTAATTTATGGGATAAAAACAAATTAGGAAATATTATGAGAGC…	ATGAGCTCTCAAATCTGCAGATCTGCTTCCAAAGCAGCAAGGTCTCTTCTTTCCTCAGCTAAGACCGCTCGTTTCTTCTCCGAAGGACGAGCGATTGGTGCAGCAGCAGCGGTCACTGCATCTGCAAAGATCCCTCTCTATGCATCTAACTTTGCAAGATCATCATCAGGTTCTTCCAAGAGCTGGATCACTGGACTCTTGGCTCTTCCTGCTGCAGCCTACATGGTTCAAGATCAGGAGGTTCTTGCTGCTGAGATGGAACGCACGTTCATCGCTATCAAGCCTGATGGAGTGCAGCGAGGACTGATATCAGAGATTGTTGCTCGATTCGAACGCAAGGGATTCAAGCTTGTTGGTATCAAGGTCGTTGTTCCTTCCAAAGATTTTGCACAGAAGCAT…	MSSQICRSASKAARSLLSSAKTARFFSEGRAIGAAAAVTASAKIPLYASNFARSSSGSSKSWITGLLALPAAAYMVQDQEVLAAEMERTFIAIKPDGVQRGLISEIVARFERKGFKLVGIKVVVPSKDFAQKHYHDLKERPFFNGLCDFLSSGPVIAMVWEGEGVIRYGRKLIGATDPQKSEPGTIRGDLAVVVGRNIIHGSDGPETAKDEINLWFKPQELVSYTNNAEKWIYGDN*
BjuVB03G06790.1	BjNDPK10	CAAACTTCGAGCTGTAAGACCGTTCATTCAAATATAATATAATAATATATGATATGGCATACAAGAAAACTGATCTTTTTAGTTAACACGTATTTTTTTTTTTTTTTGAACATTGGTTAATACGTATTTGCACCGTCCAACCAACAAATCTATGTGAATTGGGTATCAGACAGAAATAAATTCTCGATCAAGAGATGTTTTTCTCAAGTGTCAACGAATCCAAGTAAATTATAGTTACATGTCAATATCATTTTATTGGTTTATTTTTAAAAGCCTAAATTGTGAGATTTTGATGGAACTTTTGAATTTGAATGCTACACGAATAAGACGTCTGTGTAAATTTCGGCCCATGAATGCATCCAATCTAGGGGTCATGTGCGTCTTCCACCGTCCAAGTTT…	ATGTCAGGACTCGCAGCTCACCTAGTGCTCCTCCTCGTTGTTGTCTCCGTCTCCTTGGCGCCGTCGTCGGTCAGGTGTTTAGGTAAAGAGAGAACATTGGCTATGATAAAGCCAGATGGAGTCTCTGGTAACTACACTGAGGAGATCAAAAGGATCGTTGTCGAGGCAGGTTTCGATATCGTCGAGGAGAGGCTTACTCAGCTGGACAAGGAGACAGCCTCTGCGTTTTACGACGAGCATTCGTCAAGGAGCTTTTTTCCTGATCTTGTTTCTTACATGACAAGTGGTCCGGTGCTGGTGATGGTGTTGGAGAAGAGAGACGCTGTTTCTGATTGGCGTGGTTTAATCGGGCCTACTGATGCGCAAAAGGCTAAGATTTCTCATCCTCACAGCATCAGA…	MSGLAAHLVLLLVVVSVSLAPSSVRCLGKERTLAMIKPDGVSGNYTEEIKRIVVEAGFDIVEERLTQLDKETASAFYDEHSSRSFFPDLVSYMTSGPVLVMVLEKRDAVSDWRGLIGPTDAQKAKISHPHSIRALCGKDSQRNCVHGSDSTSSAEREIKFFFNDVVSDDIASQHDEL*
BjuVB04G15590.1	BjNDPK11	TATCATTGGGTATCATACGTTTTAGAGGCAGACCTTCTAAGTTTTTCCTGGGAAGTTTCGTGCTTCGCAACACTCCATCTCTAGAAATGGCCCCCGAACGCCCCTATCTAGAACGCCCAGGCTGCACCACCACCACAGCGACTTCCACCAGACCATGTGTTATCAGTCTTTTATAGCGCGTGCTGGTCCTTTGTGGTTGAACCAATTAATCCAAGAAGAAGCAGTTGTAGACGTTGCAACAGACTAAGACTCCTCGAAACTTTTCAAAGTAGCAGGCTCTCTTGATGTGTAATGGCCTCTGTTTTATTTTGGATAGAGCACTCTGTTTTGAGCTCTTTATATCTGTTGCTGTTTTTTATATGTTTCGGCCGGCCCTTTTTAAGACTCACTTAGTCACTT…	ATGGAGCAAACTTTCATCATGATCAAGCCCGACGGCGTCCAGAGGGGTCTGATCGGTGAAATCATCTGCAGATTCGAGAAAAAGGGTTTCACTTTGAAAGGTCTAAAGATGATAACTGTGGACCGTCCTTTTGCTGAGAAACACTACCAAGACTTGTCTGCCAAGCCCTTCTTCAGTGGCCTTGTCGACTACATCATCTCTGGTCCCGTCGTTGCTATGATCTGGGAGGGGAAGAATGTTGTCTTGACGGGAAGGAAGATCATTGGAGCAACTAACCCTGCTGCCTCTGAGCCAGGAACCATCCGTGGCGATTTTGCTATTGACATTGGCAGGAACGTGATCCATGGGAGTGACTCAGTGGAGAGTGCTAACAAGGAAGCTGCGTTGTGGTTCCCAGAT…	MEQTFIMIKPDGVQRGLIGEIICRFEKKGFTLKGLKMITVDRPFAEKHYQDLSAKPFFSGLVDYIISGPVVAMIWEGKNVVLTGRKIIGATNPAASEPGTIRGDFAIDIGRNVIHGSDSVESANKEAALWFPDGPVNWQSSLHSWIYE*
BjuVB05G13160.1	BjNDPK12	AATGTTCCCTCCCTTCTCACACCTTTTTCCTTCCTTGTTTTTGATTTTACGAGAATAATTGCTCCTGATCCATCCTTATTGGCCTGTGGAGCTATCAGCAGCAGAGTTAGAATCACTTAGATCAGAACTTTCTTGACTTACAAGAAAGAGAAGCTTACCTCTAAGCACAGCACGTCGTTATTTGCTCCAATATTGTTCCCCATACTCGGATAAAATGTAGATCTCACTTCGTCTTTGTCTTCTACTCCTTACATAGGTTGGAACAAGTGGATGAAGTCTTGCGCTCGGCTCGTTTACCAAGGCTACACAAGAGAGTTCGATGAAACCCATCATTGCTTTTATATCTTAGCCCGTCAAGATCTAAGATTTGAGTGCTCAAGCACTTCTAAATCACATAGA…	ATGAGCTCCCATATCTGCAGATCAGCTTCTAGGGCAGCAAGGTCTCTTCTTTCTTCATCTAAGAACACTCGTTTCTTCTCCGAAGGCAGAGCCGTTGGTGCAGCAACATTGGTTTATGCGTCAGGAAAAGTCCCTCAGTATGCATCCAACTTTCGACAATCGGGTTCCGGCTTAGCCTCTAAGAGCTGGATCACCGGTCTCCTCGCTCTTCCTACCGCAGCTTTCATGATCCAAGATCAGGAAGTCCTTGCTGCTGAGATGGAACGCACTTTCATCGCTATCAAACCTGATGGAGTGCAGCGAGGCCTGATATCAGAAATCATTACCCGGTTCGAACGCAAGGGATTCAAGCTTGTTGGTATCAAAATCATGGTTCCTTCAAAGGGTTTCGCGCAGAAG…	MSSHICRSASRAARSLLSSSKNTRFFSEGRAVGAATLVYASGKVPQYASNFRQSGSGLASKSWITGLLALPTAAFMIQDQEVLAAEMERTFIAIKPDGVQRGLISEIITRFERKGFKLVGIKIMVPSKGFAQKHYHGLKERPFFNGLCNFLSSGPVVAMVWEGEGVIGYGRKLIGATDPQKSEPGTIRGDLAVVLGRNVIHGSDGPETAKDEISLWFKPEELVFYTNNAEKWIYGQN*
BjuVB05G47190.1	BjNDPK13	GAAGATATAATAGAAGATGAAAAAGACACATACTAACCAAAGTTTCGTTATAATTTATTTTATTATAGATGTATAAAAAATAGATAAATGATAGAACATATCTACTTTTTGTTGCAACTAAACAATTTTCAAAAAAAAAAAAAATATTTGAGAAAAATTAGTTCAAAAGATACATGTCAATCCCAAAATTGTCAAATGACTTCTGTTTTACAGTGTCAATAAAAGATTGGAATATTATAATAAATCATATATCATAATTAAATTAATCTAATGAAATATAATACTGAAAATAATGTACCAATATAACAGTAAGAAAATAATGTACTAATATAAAAGTAAAAAATTTACAAAATTTTGAAATACGATTTAATTTTAATTTTCATAATTTTATGTTTCTTA…	ATGAGCTCCCAAATCTGCAGATCTGCTTCGAAAGCAGCAAGGTCTCTTCTCTCTTCAGCTAAGAATGCTCGTTTCTTCTCCGAAGGACGAGCCATTGGTGCAGCTGCAGCGGTTACTGCATCTGGAAAGATGCCTCTCTATGCATCTAACTTTGGAAGATCATCCGGTTCTGGTGCTGCCTCAAAGAGTTGGATCACTGGACTCTTGGCTCTTCCTGCTGCAGCCTTCATGGTTCAAGATCAGGAGGTTTTTGCTGCTGAGATGGAACGCACTTTCATTGCTATCAAGCCTGATGGAGTACAGCGAGGACTGATATCAGAGATCATTTCTCGGTTTGAACGCAAGGGCTTCAAGCTTGTTGGTATCAAGGTCGTTGTTCCTTCCAAAGATTTCGCACAG…	MSSQICRSASKAARSLLSSAKNARFFSEGRAIGAAAAVTASGKMPLYASNFGRSSGSGAASKSWITGLLALPAAAFMVQDQEVFAAEMERTFIAIKPDGVQRGLISEIISRFERKGFKLVGIKVVVPSKDFAQKHYHDLKERPFFNGLCDFLSSGPVIAMVWEGEGVIRYGRKLIGATDPQKSEPGTIRGDLAVVVGRNIIHGSDGPETAKDEINLWFKPQELVSYTNNAEKWIYGDN*
BjuVB05G51000.1	BjNDPK14	TCTATCTATATATAATATTTTGTATACACATAATCCATATGTTAGAAGAAAACTACCAAAACTATGTGAAAGAGTTAGGTCGGATATTCGGGTTAGCTTCAGTTTCTTGGTTATTTTTTTAATTTTTTGTTTTTGAACATTAGTTTCTTGGTTTTGACTGAACTTATTTAGGACTTTATTCTATTATGCCCTACAAACTCTATGGTTTATTCTAATATGTCCCACTCTTAATAAATAATTTCTTTTCATTTATTTTAAAATCGAAAACGTGGCTAAGTACAGAAAAGCCCTTAATTAATTTACTTATCTACAGATCCAACCGAAACTAACCCACCCGATCCATGCCCAATCGGATCAAACCCGGATTTCCCTTAACCCTAGCACGTGTTTCTCTTCCCC…	ATGGTGAAACCAGACGGCATACAACGAGGTCTTGTTGGAGAAATCATCTCTCGTTTTAAGAAGAAGGGCTTTAAACTTATTGGACTTGAGATGTTTCAATGTCTAAAAGAATTGGCTGAGAGGAAGCTAGACGGAAGAAAGAGGAGCATCGAAGGAAGAAAAATAATGGAGTCTCCAAAGAAGATAGCTCATGAGATCGGTGGTGTCAAGAGAGACGCTCTTCGATTCGGTCTCAACGGCGTTAAGAGCGACATCGTCGGATCTCACCCACTCGAATCCTCTTACGAATCTGGAAAGAGATCGCACGAGGCGATGAAGAAGACGATCATTGGGCATACCTACGGGTCTGCACTTCCGTTGAAGATGGATATGGACAGGCAAATTCTCTCACGGTTTCAG…	MVKPDGIQRGLVGEIISRFKKKGFKLIGLEMFQCLKELAERKLDGRKRSIEGRKIMESPKKIAHEIGGVKRDALRFGLNGVKSDIVGSHPLESSYESGKRSHEAMKKTIIGHTYGSALPLKMDMDRQILSRFQRPPGPIASSMLGLEVYTGAIDDFGFEDYLNDPRDSEAFKPVDFHHGMEVRLGISKGPVAPSFM*
BjuVB06G12430.1	BjNDPK15	GCATGGAGAAGAGCAAATAGAGAATGTGCCAGTATGTCCCCACAGAGAAGAGAGAGAAGACCAAGTCGTTAGTGGAAGTGAAGGCAGAGAAGAAGTGGTAATCGAAAAGGCACAATATAGTGGGACCATGGACGACGAAGAACTCATTATTCAAAATGAAGGAAAACAATAATTGGATAATGCGCCAGAACAAGAAAATGGAATGGACAATGGAGATGAAGAAGCTGAAGTTGTAAATGTTGACATGGTAAAGGCAGAAACTGAAGTTGTCGACTCGAGAGAGCAAAGACTAAACTAGTTGATATGGAGAGAAAGAAACTAAAGTTGTCGACATGGGAGGACAAGAAAAAGAAATTGGCGACATGGGACAGGAAACTGAAGTTGTCCACAAGGAAGTGG…	ATGGTTGGTATGGCTGTGCTTGGTCAATGGTCTCTCTGTGTCGCCTCGCCGTCGCCTAAAGTAAAGTCGGCGACTTGCAATTCAAACTCTTGTCCGGCCTCTGTGAACTTATGCACCGAGCTGGCAGCGTTTCGTCCTCAGTTCCGTCTCTTCTCTCGTGTTTCTCCGTCCCGCCGGCGTCTTTGCGCTTCAAGCTCAGCCGATTCGGGAATCTTCCTCCCTCACCTTGTCGCTTCTATGGAGCAAGTTGAGGAGACTTACATTATGGTCAAACCAGACGGCATCCAACGAGGCCTTGTTGGAGAAATCATCTCTCGTTTTGAGAAGAAAGGATTTAAACTGGTTGGACTTAAGATGTTCCAATGTCCAAAGGAGTTGGCTGAGGAACATTATAAGGAT…	MVGMAVLGQWSLCVASPSPKVKSATCNSNSCPASVNLCTELAAFRPQFRLFSRVSPSRRRLCASSSADSGIFLPHLVASMEQVEETYIMVKPDGIQRGLVGEIISRFEKKGFKLVGLKMFQCPKELAEEHYKDLSAKSFFPSLIEYITSGPVVCMAWEGVGVVASARKLIGKTDPLQAEPGTIRGDLAVQTGRNIVHGSDSPENGKREIALWFKEGELCEWESALAKWLRE*
BjuVB07G18080.1	BjNDPK16	AAGCTGATGTTATGGACAAGGGAGATGTAGAAACTGGAACTGTCGACGTGGAAGGGGTGGAAACTGGAGTTGTGGAGATGGTAAAGGTAGGTACTGAAGTAGTTGACATGAGAGAGCAAGAGATCGAAGTAGTTGGCAATGGAGAGAAAGAAACTGAAGTTGTGGAGATGGAAGAGCAAGAAACTGAAGTTGTGGACATGGGAGAGCAAGAAAATGGAACTGAGGGCAAGGGAGACGAAGAAGCTGTGGACAAGGGAGATGAAGAAGCTGGAATTGTCGACATGGAAGAGAAAGAAACTGAAGTTGTGGAGATGGTAAAGGTAGAAACTGAAGTAGTTGACATGAGAGAGCAAGTGACTGATACTCTTGACAATGGAGAGCAAGAAACTGAAGTTTTTG…	ATGGCAGTGGTTGGTCAATGGACTCTCTGTGTCGCTTCGCCGTCGTCTTCTTCTTCTTCATCGTCGCCGAGATTAACTCCGTCTATACGCAACTCAAACTCGTCTTCAACTACTGTTAACTTACGCACTGAGCTGGCAGCATTCCGTCCTCAGTTCCGTCTTTTCTCTCGTGTTTCTCCGTCCCGTCGCCGTCTTCGCGCTTCCAGCTCCGGAGATTCAGGAATCTTCCTCCCTCACCTTGTCTCTTCTATGGAGCAAGTTGAAGAGACTTACATCATGGTGAAACCAGACGGCATACAACGAGGCCTTGTTGGAGAAATCATCTCTCGTTTTGAGAAGAAGGGATTTAAACTTATTGGACTTAAGATGTTCCAGTGCCCTAAAGAATTGGCTGAGGAA…	MAVVGQWTLCVASPSSSSSSSSPRLTPSIRNSNSSSTTVNLRTELAAFRPQFRLFSRVSPSRRRLRASSSGDSGIFLPHLVSSMEQVEETYIMVKPDGIQRGLVGEIISRFEKKGFKLIGLKMFQCPKELAEEHYKDLSSKSFFPSLIEYITSGPVVCMAWEGVGVVASARKMIGKTDPLQAEPGTIRGDLAVQTGRNIVHGSDSPENGKREIALWFKDGELCEWDSALAKWLRE*
BjuVB07G49680.1	BjNDPK17	TATATGGTCAGAGTTATCTACTTTGATTCTGAAGCTTATTGTGTTTTTCTGTTGGAAAGAGATTATGCTTTTAACTGTTTTCTTTCGATATGGATTGAATATAACAGAAATAAAATTCACAGTAATGTAGTGTTTGCCTATTGTGCAACACAGTTAATTTTGTTTCAGCTAATTTCTATGGGGTAAATTTTATATAAATATCCTATTTAAATTTTGTTAAACCATTTACCACCCAATTTTTTTTGTTGCCCAGTGTAACACATAAACTAATTTCTCTTTTCTTTTAATAAACAAACTTTTAAAACTGTGCTTTTATATAAGTTTCAAACAATTTCTTTTTTTTTTTTTTTCAAAATCCACAAATTTTTTTTAAAGTTCAAAATTTATTTAAATTTTATG…	ATGGAGCAAACTTTCATCATGATCAAGCCCGACGGCGTCCAGAGGGGTCTGGTCGGTCAAATCATCTGCAGGTTCGAGCAGAAGGGTTTCACTTTGAAAGGTCTAAAGCTGATCACAGTGGACCGTCCTTTTGCTGAGCAGCACTACCAAGACTTGTCAGCAAAGCCATTTTTCAGTGGCCTTGTTGATTACATAATCTCTGGCCCAGTCGTTGCAATGATCTGGGAGGGGAAGAACGTTGTATTGACAGGAAGGAAGATCATTGGAGCAACTAACCCTGCAGCATCTGAACCAGGAACCATCCGTGGGGATTTTGCAATTGACATTGGCAGGAACATTATCCATGGGAGTGACTCGGTGGAGAGTGCTAACAAGGAATGTGCGTTGTGGTTCCCTGAT…	MEQTFIMIKPDGVQRGLVGQIICRFEQKGFTLKGLKLITVDRPFAEQHYQDLSAKPFFSGLVDYIISGPVVAMIWEGKNVVLTGRKIIGATNPAASEPGTIRGDFAIDIGRNIIHGSDSVESANKECALWFPDGPVNWQSSLHSWIYE*
BjuVB08G41150.1	BjNDPK18	TGTAAATGTTTATAATTTATTATTATTTAGTAAAATTAATAAAACTTAATTAAATAATAAAATTTTAATCTTATATAAGAGAGATATTTGTTATAATTTTTTGATCCTATTAATTACTCTTATTCAATCTTTGTTATGTGTTTGTTTTGAAATTTTTTTTAGATCGGTTGTGTAATCATGTGAATAATTTGTTTTAAGAGATTAAGAAATTATGATATGTTAATTTAAATTCTTTAAATGTAAAGAATATAACCAAGATTAATGATAGTAACACGACTGCAACACTAGCATTGAATTTAAATCATCACAACACATATATATATAACTCTTATAAGGAAGGTATTATATTAGGATTGAAACATTTATGAAGATATCTTATATATGATAAAAATTTATTTA…	ATGAGCTCTCAAATCTGCAGATCTGCTTCCAAAGCAGCAAGGTCTCTTCTTTCCTCAGCTAAGAATGCTCGTTTATTCTCCGAAGGACGAGCCATTGGTGCAGCAGCAGCGGTTACTGCATCGGGGAAGATCCCTCTCTATGCATCTAACTTTGGAAGATCATCAAGTTCTTCAAAGAGTTGGATCACTGGACTCTTGGCTCTTCCTGCTGCAGCCTACATGGTTCAAGATCAAGAGGTTCTTGCTGCTGAGATGGAACGTACATTCATAGCTATCAAGCCTGATGGAGTGCACCGAGGACTGATATCAGAGATTGTTTCTCGATTCGAACGCAAGGGATTCAAGCTTGTTGGTATCAAGGTCGTTGTTCCTTCGAAAGATTTCGCGCAGAAGCATTAC…	MSSQICRSASKAARSLLSSAKNARLFSEGRAIGAAAAVTASGKIPLYASNFGRSSSSSKSWITGLLALPAAAYMVQDQEVLAAEMERTFIAIKPDGVHRGLISEIVSRFERKGFKLVGIKVVVPSKDFAQKHYHDLKERPFFNGLCDFLSSGPVIAMVWEGEGVIRYGRKLIGATDPQKSEPGTIRGDLAVVVGRNIIHGSDGPETAKDEINLWFKPQELVSYTNNAEKWIYGDN*
