# Supplementary material for: Genome-Wide Characterization of the Brassica juncea NDPK Gene Family and Functional Analysis in Root Development Under Drought Stress
Source: Research Square preprint supplement (doi:10.21203/rs.3.rs-8694630/v1), 2026-02-04
Supplement: Supplementary file 4 [file d87be236e6bdc0dce8fefa8c.xlsx]

## Sheet: Sheet1
Gene	geNorm_M	DeltaCt_SD	MeanCt	SD_Ct	CVpct_Ct	r_vs_Index	rank_geNorm	rank_DeltaCt	rank_SD	rank_CV	rank_abs_r	AggregateRank
qBjActin	0.596802763702407	0.596802763702407	23.6059259259259	0.471440176963993	1.99712639293771	0.826029416398054	1	1	1	3	1	1.4
BjuTIP41	0.817340203752646	0.876393802389141	26.262962962963	0.471648620958889	1.79586980198702	0.072965169441957	3	2	2	1	3	2.2
Bj18srRNA	0.655856362338903	0.689486062338903	27.5103703703704	0.535748803663415	1.94744307855788	0.728304670325816	2	3	3	2	2	2.4
Ct values of the internal reference under different treatments
	CK			PEG
	-1	-2	-3	-1	-2	-3
qBjActin	22.11	23.88		23.3	23.15	23.62
	22.31	23.52	23.93	23.15	23.14	23.61
	23.08	23.41	23.04	23.14		23.45
Bj18sRNA		25.87	27.19	24.85	27.88	26.96
	25.19	25.07	27.28	25.86	26.34	26.32
	25.03		26.83	24.95	28.52	27.15
BjuTiP41	27.68	27.11	27.24	26.91	27.58	29.52
	27.22	27.26	27.52	27.17	27.2	29.61
	27.11	27.31	27.4	26.38	27.2	28.19
