# Supplementary material for: Genome-Wide Characterization of the Brassica juncea NDPK Gene Family and Functional Analysis in Root Development Under Drought Stress
Source: Research Square preprint supplement (doi:10.21203/rs.3.rs-8694630/v1), 2026-02-04
Supplement: Supplementary file 5 [file e3a00b7e89604fc8b636ec14.xlsx]

## Sheet: Sheet1
Information of the members of the BjNDPK gene family
Sequence ID	Gene ID	Number of Amino Acid	Molecular Weight	Theoretical pI	Instability Index	Aliphatic Index	Grand Average of Hydropathicity	Subcellular localization（ WoLF PSORT）	Groups
BjuVA03G44880	BjNDPK3	111	12067.7	5.61	26.28	86.94	-0.203	cyto	group 1
BjuVA08G00430	BjNDPK5	148	16394.9	6.82	29.64	91.55	-0.051	cyto	group 1
BjuVA09G21280	BjNDPK8	148	16395.8	6.29	27.75	91.55	-0.089	cyto	group 1
BjuVB04G15590	BjNDPK11	148	16381.9	6.29	27.69	89.59	-0.069	cyto	group 1
BjuVB07G49680	BjNDPK17	148	16394.8	5.88	32.09	91.55	-0.046	cyto	group 1
BjuVA06G28970	BjNDPK4	231	25435.5	9.12	47.35	84.42	-0.109	chlo	group 2
BjuVA09G08030	BjNDPK7	228	25245.2	8.76	56.45	84.25	-0.167	chlo	group 2
BjuVB05G51000	BjNDPK14	196	21860.4	9.47	30.57	79.59	-0.433	cyto	group 2
BjuVB06G12430	BjNDPK15	231	25341.3	8.4	51.06	84.85	-0.078	chlo	group 2
BjuVB07G18080	BjNDPK16	235	25915.6	9.1	59.94	80.47	-0.254	chlo	group 2
BjuVA01G15720	BjNDPK1	237	25953.7	9.66	38.19	76.58	-0.239	mito	group 4
BjuVB05G13160	BjNDPK12	237	25891.7	9.54	33.88	83.16	-0.142	mito	group 4
BjuVA02G31310	BjNDPK2	235	25573.3	9.32	37.13	84.34	-0.145	mito	group 3
BjuVA09G27700	BjNDPK9	236	25629.3	9.3	35.15	86.06	-0.123	mito	group 3
BjuVB05G47190	BjNDPK13	238	25792.5	9.32	35.62	82.06	-0.143	mito	group 3
BjuVB08G41150	BjNDPK18	235	25548.2	9.3	36.53	86.81	-0.158	mito	group 3
BjuVA08G31340	BjNDPK6	176	19383.1	6.37	38.73	89.09	-0.144	E.R.	group 5
BjuVB03G06790	BjNDPK10	177	19426	5.33	36.88	91.92	-0.117	E.R.	group 5
