# Supplementary material for: Genome-Wide Characterization of the Brassica juncea NDPK Gene Family and Functional Analysis in Root Development Under Drought Stress
Source: Research Square preprint supplement (doi:10.21203/rs.3.rs-8694630/v1), 2026-02-04
Supplement: Supplementary file 6 [file f8b946d4fbbe163b51aa2158.xlsx]

## Sheet: Sheet1
Seq_1	Seq_2	Gene-1ID	Gene-2ID	Ka	Ks	Ka_Ks
BjuVA01G15720.1	BjuVB05G47190.1	BjNDPK1	BjNDPK13	0.0811205	0.6507123268851798	0.12466413384157207
BjuVA01G15720.1	BjuVB05G13160.1	BjNDPK1	BjNDPK12	0.039984086768426644	0.1619162853247783	0.24694295998839727
BjuVA01G15720.1	BjuVB08G41150.1	BjNDPK1	BjNDPK18	0.0929843	0.7104973851315401	0.13087217856948657
BjuVA01G15720.1	BjuVA02G31310.1	BjNDPK1	BjNDPK2	0.0917286	0.6806036013300546	0.1347753176026196
BjuVA01G15720.1	BjuVA09G27700.1	BjNDPK1	BjNDPK9	0.0906145	0.6292012455160825	0.1440151595739403
BjuVA02G31310.1	BjuVA09G27700.1	BjNDPK2	BjNDPK9	0.017056957516845855	0.24654019486267115	0.0691853
BjuVA02G31310.1	BjuVB05G47190.1	BjNDPK2	BjNDPK13	0.00374708	0.1350510674338251	0.027745655513718402
BjuVA02G31310.1	BjuVB05G13160.1	BjNDPK2	BjNDPK12	0.0698178	0.6199035854117392	0.11262689705712231
BjuVA02G31310.1	BjuVB08G41150.1	BjNDPK2	BjNDPK18	0.015125768688232712	0.23943533666616795	0.0631727
BjuVA02G31310.1	BjuVA09G27700.1	BjNDPK2	BjNDPK9	0.017056957516845855	0.24654019486267115	0.0691853
BjuVA06G28970.1	BjuVA09G08030.1	BjNDPK4	BjNDPK7	0.0488545	0.30409883108112296	0.1606532864810271
BjuVA06G28970.1	BjuVB06G12430.1	BjNDPK4	BjNDPK15	0.023190253240669693	0.20465023999998005	0.11331652110777858
BjuVA06G28970.1	BjuVB07G18080.1	BjNDPK4	BjNDPK16	0.036574533620193084	0.3513723524663728	0.1040905277932855
BjuVA08G00430.1	BjuVB07G49680.1	BjNDPK5	BjNDPK17	0.00580835	0.20985268865977594	0.027678245790908537
BjuVA08G31340.1	BjuVB03G06790.1	BjNDPK6	BjNDPK10	0.0381115	0.17088471063083707	0.22302464031284577
BjuVA09G08030.1	BjuVB06G12430.1	BjNDPK7	BjNDPK15	0.0570465	0.33381715157797204	0.17089143968455267
BjuVA09G08030.1	BjuVB07G18080.1	BjNDPK7	BjNDPK16	0.0375634	0.2076195119537358	0.18092443265756233
BjuVA09G21280.1	BjuVB04G15590.1	BjNDPK8	BjNDPK11	0.0116677	0.2651531228815501	0.0440037
BjuVA09G27700.1	BjuVB05G47190.1	BjNDPK9	BjNDPK13	0.017000570481779883	0.22854491713271366	0.0743861
BjuVA09G27700.1	BjuVB05G13160.1	BjNDPK9	BjNDPK12	0.0819085	0.6127228357790112	0.13367946057468863
BjuVA09G27700.1	BjuVB08G41150.1	BjNDPK9	BjNDPK18	0.015652742044185246	0.1811681872362788	0.086399
BjuVB05G13160.1	BjuVB05G47190.1	BjNDPK12	BjNDPK13	0.0717342	0.6115549964238355	0.11729801327383446
BjuVB05G13160.1	BjuVB08G41150.1	BjNDPK12	BjNDPK18	0.084233	0.6215195044171264	0.1355274598085242
BjuVB05G47190.1	BjuVB08G41150.1	BjNDPK13	BjNDPK18	0.013224523988217027	0.2231073525330513	0.0592743
BjuVA02G19050.1	BjuVB05G51000.1		BjNDPK14	0.018721720919935375	0.13294369112805596	0.1408244404911397
BjuVA07G34210.1	BjuVB05G51000.1		BjNDPK14	0.034670038121425106	0.22342771989248938	0.15517339629168617
BjuVA07G32870.1	BjuVB05G51000.1		BjNDPK14	0.025047984053680347	0.21005810479992143	0.11924312121895196
BjuVB03G39830.1	BjuVB05G51000.1		BjNDPK14	0.028164978346224962	0.1853760606578251	0.15193428022085903
BjuVB03G38540.1	BjuVB05G51000.1		BjNDPK14	0.0282386	0.1967095878166758	0.1435549225952495
BjuVB06G12430.1	BjuVB07G18080.1	BjNDPK15	BjNDPK16	0.044648658521858293	0.39355	0.1134509906310152
